# Supplementary material for: Ultrasensitive photoelectrochemical detection of glutathione based on the multifunctional catalytic properties of phosphotungstic acid
Source: Royal Society of Chemistry journal article supplement (doi:10.1039/d3an00702b), 2023-01-01
Supplement: d3an00702b1.pdf [file d3an00702b1.pdf]

## Supporting Information

### **Ultrasensitive photoelectrochemical detection of glutathione based on the multifunctional catalytic properties of phosphotungstic acid**

Yifan Jiang <sup>a</sup>, Huilan Zhang <sup>a</sup>, Meizhu Xu <sup>d</sup>, Fang Luo <sup>b</sup>, Cuiying Lin <sup>c</sup>, Bin Qiu <sup>a</sup>,  
Zhenyu Lin <sup>a</sup>, Zhou Jiang <sup>c</sup>, Jian Wang <sup>a, \*</sup>

<sup>a</sup> Ministry of Education Key Laboratory for Analytical Science of Food Safety and  
Biology, Fujian Provincial Key Laboratory of Analysis and Detection for Food Safety,  
College of Chemistry, Fuzhou University, Fuzhou, Fujian 350116, China

<sup>b</sup> College of Biological Science and Engineering, Fuzhou University, Fuzhou, Fujian,  
350116, China

<sup>c</sup> College of Chemistry, Fuzhou University, Fuzhou, Fujian, 350116, China

<sup>d</sup> Comprehensive Technology Service Center of Quanzhou Customs, Quanzhou, Fujian,  
362000, China

## Reagents and Apparatus

Phosphotungstic acid (PTA), glutathione (GSH), oxidized glutathione (GSSG), L-cysteine (L-cys), ascorbic acid (AA), dopamine (DA) and glucose (Glu) were purchased from Aladdin Reagent Co., Ltd (Shanghai, China). Anhydrous sodium sulfate ( $\text{Na}_2\text{SO}_4$ ), sodium hydroxide (NaOH), copper sulfate ( $\text{CuSO}_4 \cdot 5\text{H}_2\text{O}$ ), sodium citrate ( $\text{C}_6\text{H}_5\text{Na}_3\text{O}_7 \cdot 3\text{H}_2\text{O}$ ), anhydrous ethanol, and acetone were purchased from Sinopharm Chemical Reagent Co., Ltd (Shanghai, China). Natural killer cells (NK-92), human acute lymphoblastic leukemia cells (CEM) and special culture medium were purchased from Guangzhou Saiku Biotechnology Co. RIPA lysate was purchased from Dalian Meilun Biotechnology Co. All chemicals were of analytical grade and did not require further purification. All solutions were prepared with Milli-Q ultrapure water.

Transmission electron microscope (TEM) images were recorded by using field emission transmission electron microscope FEI Talos F200S G2 instrument (FEI, USA). X-ray diffraction (XRD) patterns were characterized by a Bruker D8 Advance diffractometer under  $\text{Cu-K}\alpha$  radiation ( $\lambda = 1.5406 \text{ \AA}$ ). Ultraviolet photoelectron spectroscopy (UPS) analysis was performed using a Thermo Scientific ESCALAB 250 Xi XPS system under He I ( $h\nu = 21.2 \text{ eV}$ ) radiation. UV-Vis absorption spectra were characterized using a Varian Cary 5000 Scan UV-Vis-NIR spectrophotometer with  $\text{BaSO}_4$  as reference. X-ray photoelectron spectroscopy (XPS) study was performed on an ESCALAB 250 (Thermo Scientific) using an Al  $\text{K}\alpha$  monochromated source (1486.6 eV). PEC tests were performed using a homemade PEC system. The photoelectric signal detection was performed on a CHI660C electrochemical workstation (Chenhua

Instruments, Shanghai, China) with a three-electrode system, Cu<sub>2</sub>O/ITO as the working electrode, platinum column as the counter electrode, and saturated Ag/AgCl electrode as the reference electrode. The illumination source was a 300W PLS-SXE300 Xe lamp and the shutter controller was a PFS40A shutter controller (Bofeilei Technology Co., Ltd., Beijing, China).

### **The effect of glutathione and cuprous oxide interaction verified by cyclic voltammetry**

When GSH is introduced into the supporting electrolyte solution, it can effectively enrich the surface of electrode by forming Cu-S bonds with copper ions that exist on the surface of Cu<sub>2</sub>O since GSH contains thiol groups. By doing so, it can increase the effective concentration of GSH. The redox peak signal intensity of Cu gradually decreases with the increase of GSH concentration, as shown in Figure S1A. This is because the thiol group in GSH can form a stable chemical bond with Cu coordination. On the other hand, as illustrated in Figure S1B, the thiol groups in the GSSG molecule were oxidized to form disulfide bonds and hence could not form chemical bonds with Cu ligands, indicating that GSSG had no effect on the signal intensity of the redox peak of Cu. These experimental outcomes are in agreement with the findings reported in the literature<sup>1-3</sup>.

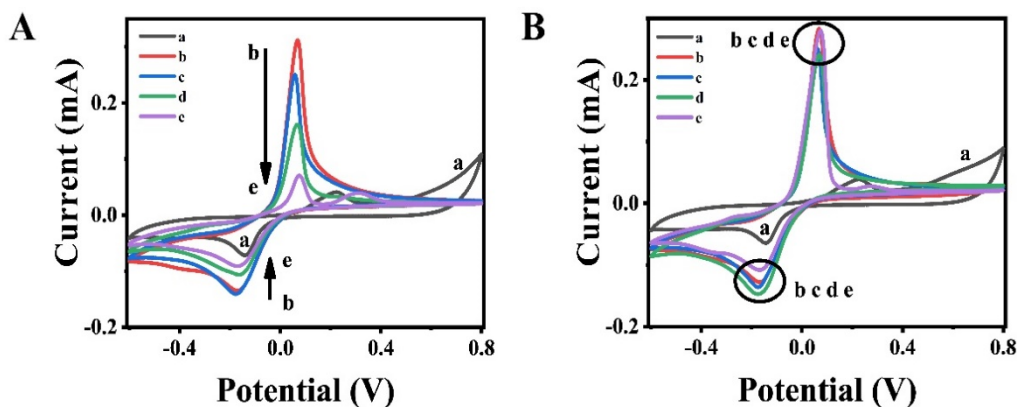

**Fig. S1** The effect of (A) GSH and (B) GSSG on the CV response of electroactive  $\text{Cu}_2\text{O}$  nanocubes. Panel (a) represents the response of  $\text{Cu}_2\text{O}$  alone, whereas in panel (b), the response of  $\text{Cu}_2\text{O}$  is shown in combination with  $10.0 \mu\text{mol/L}$  PTA. Panels (c-e) show the response of  $\text{Cu}_2\text{O}$  combining with  $10.0 \mu\text{mol/L}$  PTA and three different concentrations of GSH/GSSG ( $1.00$ ,  $10.0$ , and  $100 \mu\text{mol/L}$ ) in  $0.1 \text{ mol/L}$   $\text{Na}_2\text{SO}_4$  solution ( $\text{pH} = 7.4$ ) with a scan rate of  $0.1 \text{ V/s}$  and a scan potential range of  $-0.6$ - $0.8 \text{ V}$ .

## References

1. M. C. C. Areias, K. Shimizu and R. G. Compton, *Analyst*, 2016, **141**, 2904-2910.
2. H. Speisky, M. Gómez, C. Carrasco-Pozo, E. Pastene, C. Lopez-Alarcón and C. Olea-Azar, *Bioorg. Med. Chem.*, 2008, **16**, 6568-6574.
3. X. Pang, H. Bai, D. Xu, J. Ding, W. Fan and W. Shi, *Appl. Surf. Sci.*, 2021, **564**, 150397.
